# Supplementary material for: Evaluation of the Abilities of Three Kinds of Copper-Based Nanoparticles to Control Kiwifruit Bacterial Canker
Source: MDPI journal article supplement (doi:10.3390/antibiotics11070891), 2022-07-04
Supplement: s1 [file s1]

## Supplement materials

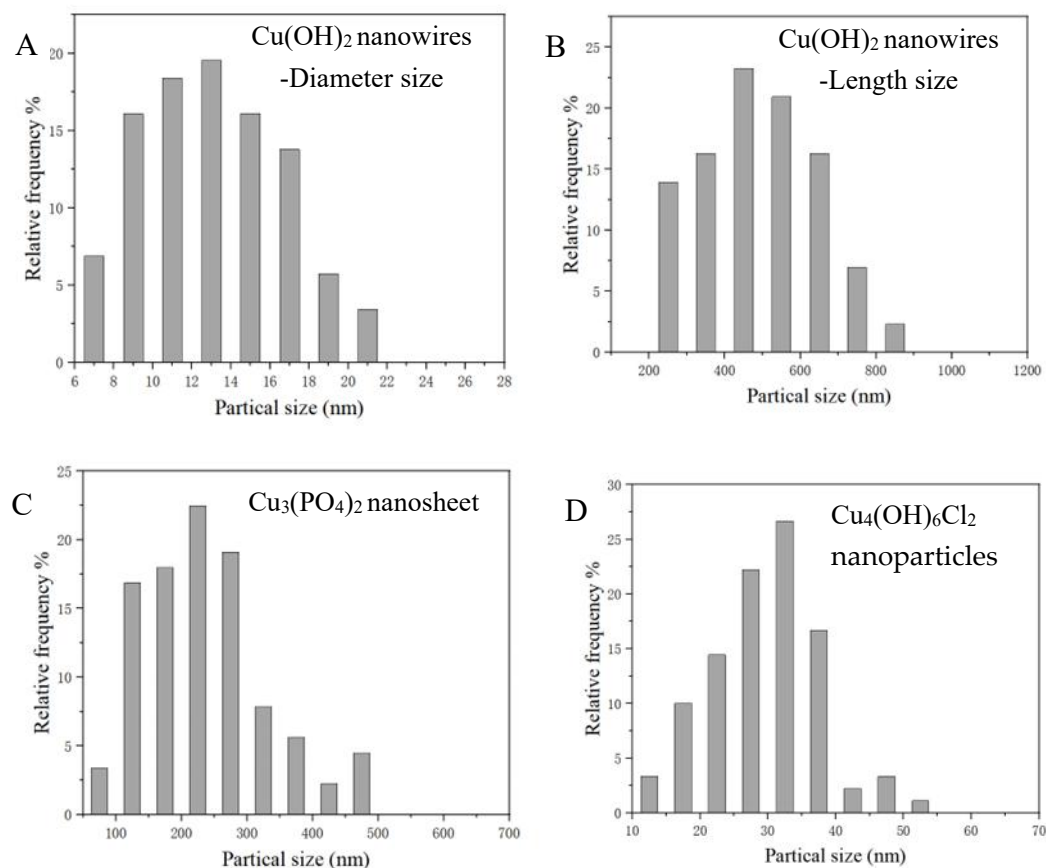

Figure S1. Size distribution of three kinds of copper-based nanoparticles. A.  $\text{Cu(OH)}_2$  nanowires diameter statistical histogram; B.  $\text{Cu(OH)}_2$  nanowires length statistical histogram; C. Histogram of length statistics of  $\text{Cu}_3(\text{PO}_4)_2$  nanosheets; D. Histogram of  $\text{Cu}_4(\text{OH})_6\text{Cl}_2$  Nanoparticle Size Statistics.

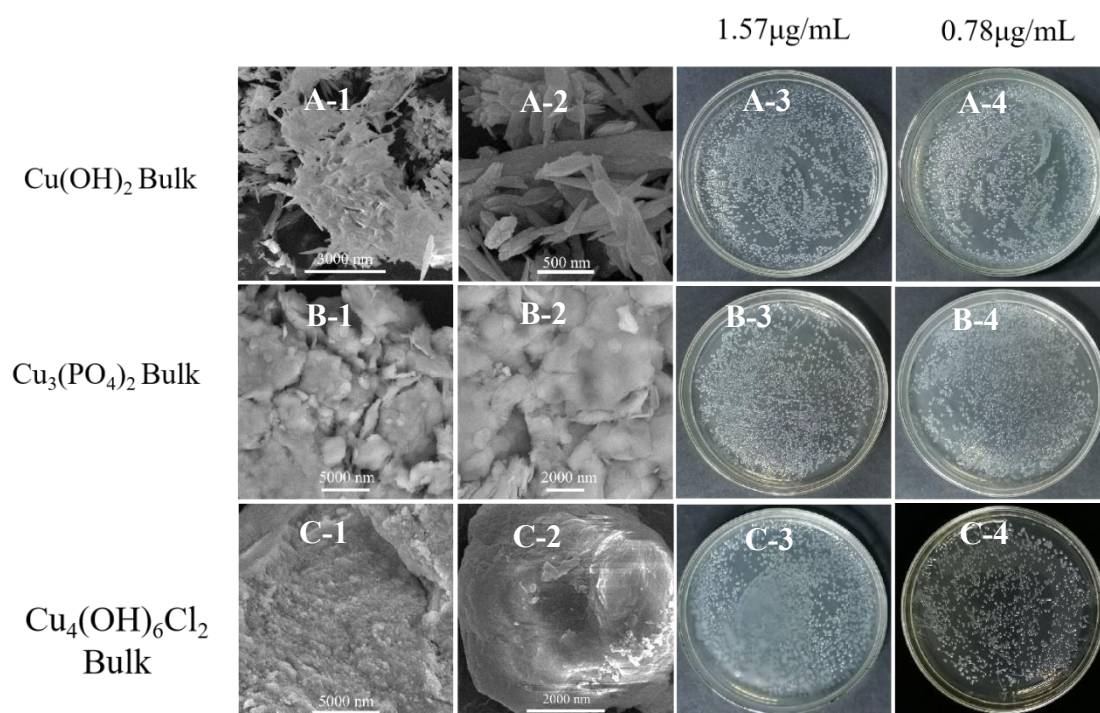

Figure S2. Characterization(A, B, C) of commercial copper-based compounds  $\text{Cu}(\text{OH})_2$ ,  $\text{Cu}_3(\text{PO}_4)_2 \cdot 3\text{H}_2\text{O}$ , and  $\text{Cu}_4(\text{OH})_6\text{Cl}_2$  and their inactivation efficiency( $\text{Cu}(\text{OH})_2$ : A-3, A-4;  $\text{Cu}_3(\text{PO}_4)_2 \cdot 3\text{H}_2\text{O}$ : B-3, B-4,  $\text{Cu}_4(\text{OH})_6\text{Cl}_2$ : C-3, C-4) of Psa.

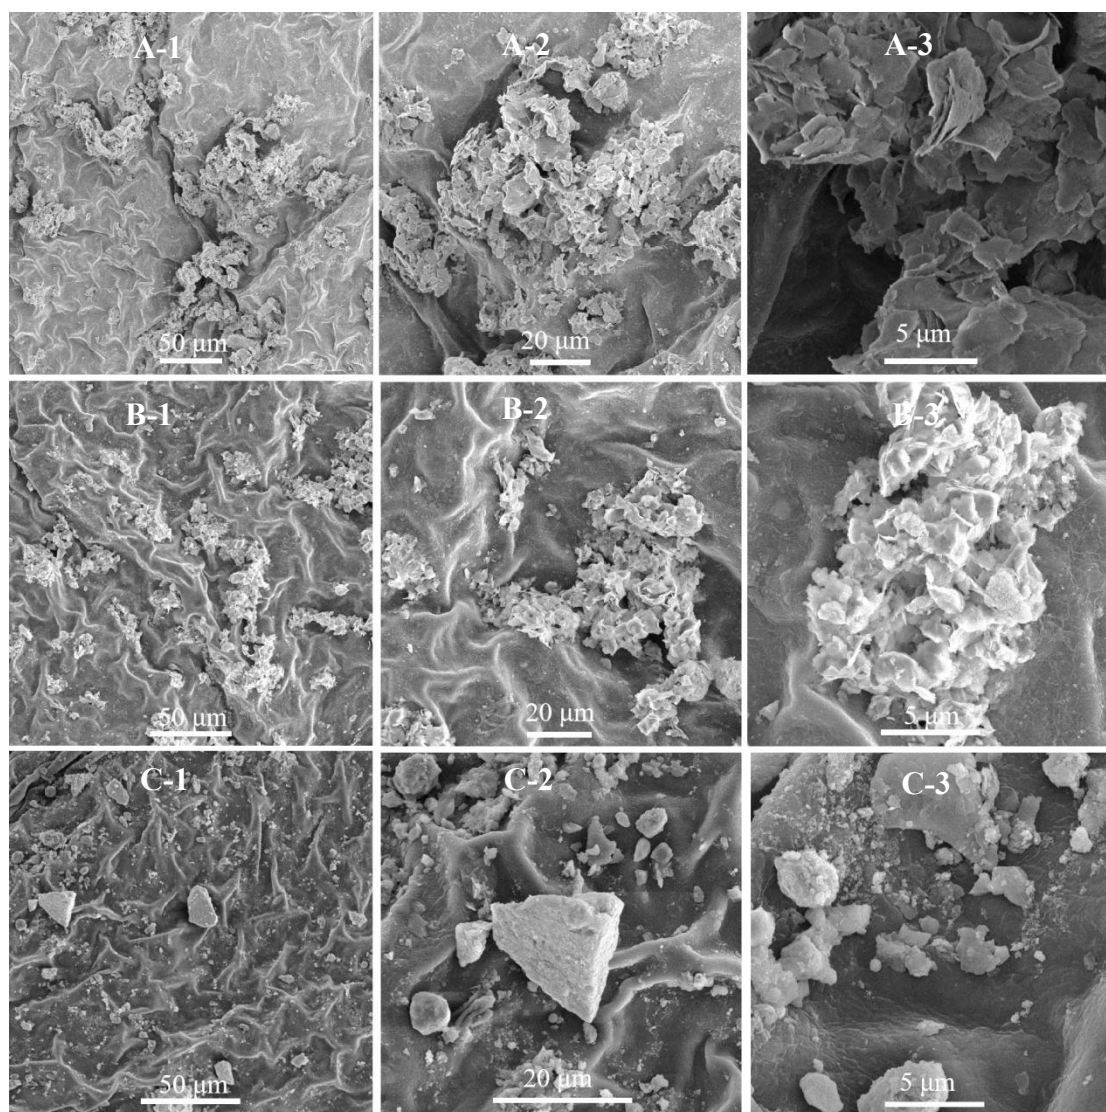

Figure S3. The distribution of three kinds of commercial copper-based compounds on the surface of kiwifruit leaves. A. Bulk  $\text{Cu}(\text{OH})_2$ ; B. Bulk  $\text{Cu}_3(\text{PO}_4)_2$ ; C. Bulk  $\text{Cu}_4(\text{OH})_6\text{Cl}_2$ .

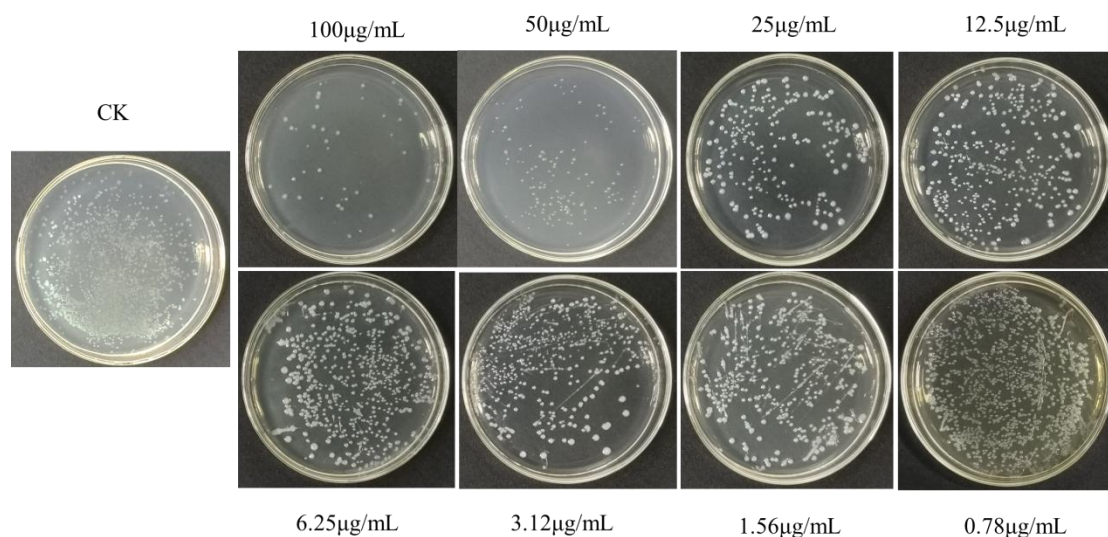

Figure S4. The MBC of the positive control agent thiodiazole copper.

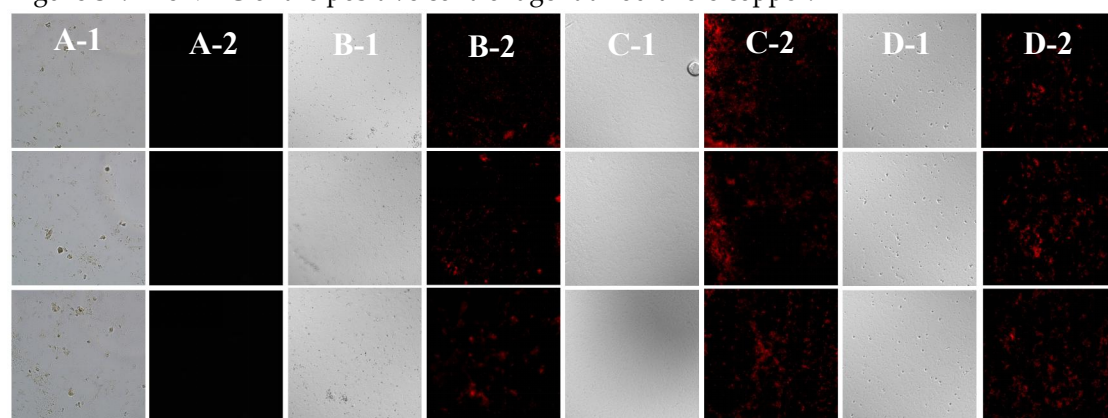

Figure S5. Supplementary fluorescence images for the membrane permeability test of Psa . A-1, B-1, C-1, D-1 bright field image; A-2, B-2, C-2, D-2 dark field image;Thiodiazole copper(A-1,A-2),Cu(OH)<sub>2</sub> nanowires (B-1, B-2), Cu<sub>3</sub>(PO<sub>4</sub>)<sub>2</sub>·3H<sub>2</sub>O nanosheets (C-1, D-2) and Cu<sub>4</sub>(OH)<sub>6</sub>Cl<sub>2</sub>nanoparticles (C-1, D-2).

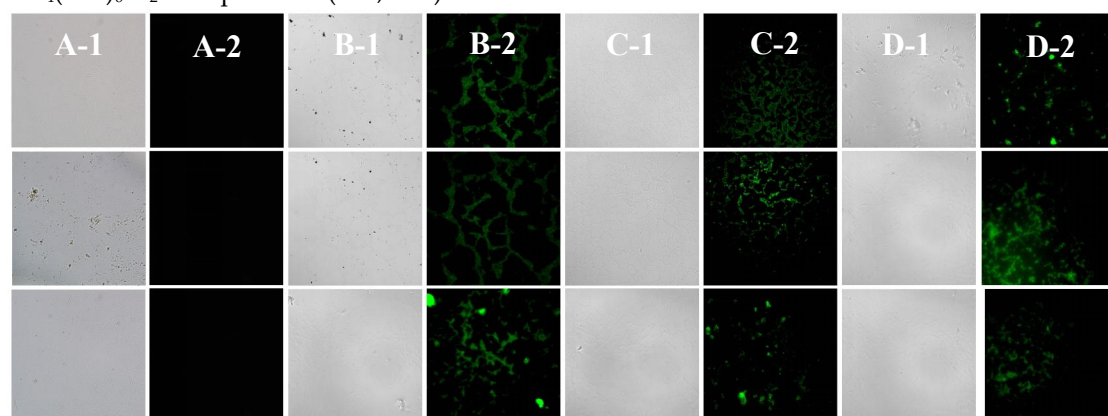

Figure S6. Supplementary fluorescence image for reactive oxygen species (ROS) accumulation test of Psa. A-1, B-1, C-1, D-1 bright field image; A-2, B-2, C-2, D-2 dark field image; Thiodiazole copper(A-1,A-2),Cu(OH)<sub>2</sub> nanowires (B-1, B-2), Cu<sub>3</sub>(PO<sub>4</sub>)<sub>2</sub>·3H<sub>2</sub>O nanosheets (C-1, D-2) and Cu<sub>4</sub>(OH)<sub>6</sub>Cl<sub>2</sub>nanoparticles (C-1, D-2).

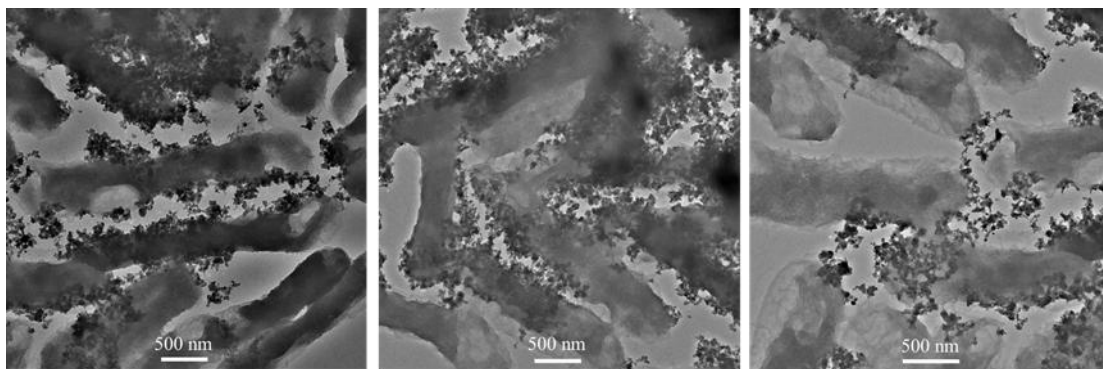

Figure S7. Supplementary TEM images for the interaction between Psa and  $\text{Cu}_4(\text{OH})_6\text{Cl}_2$  nanoparticles.



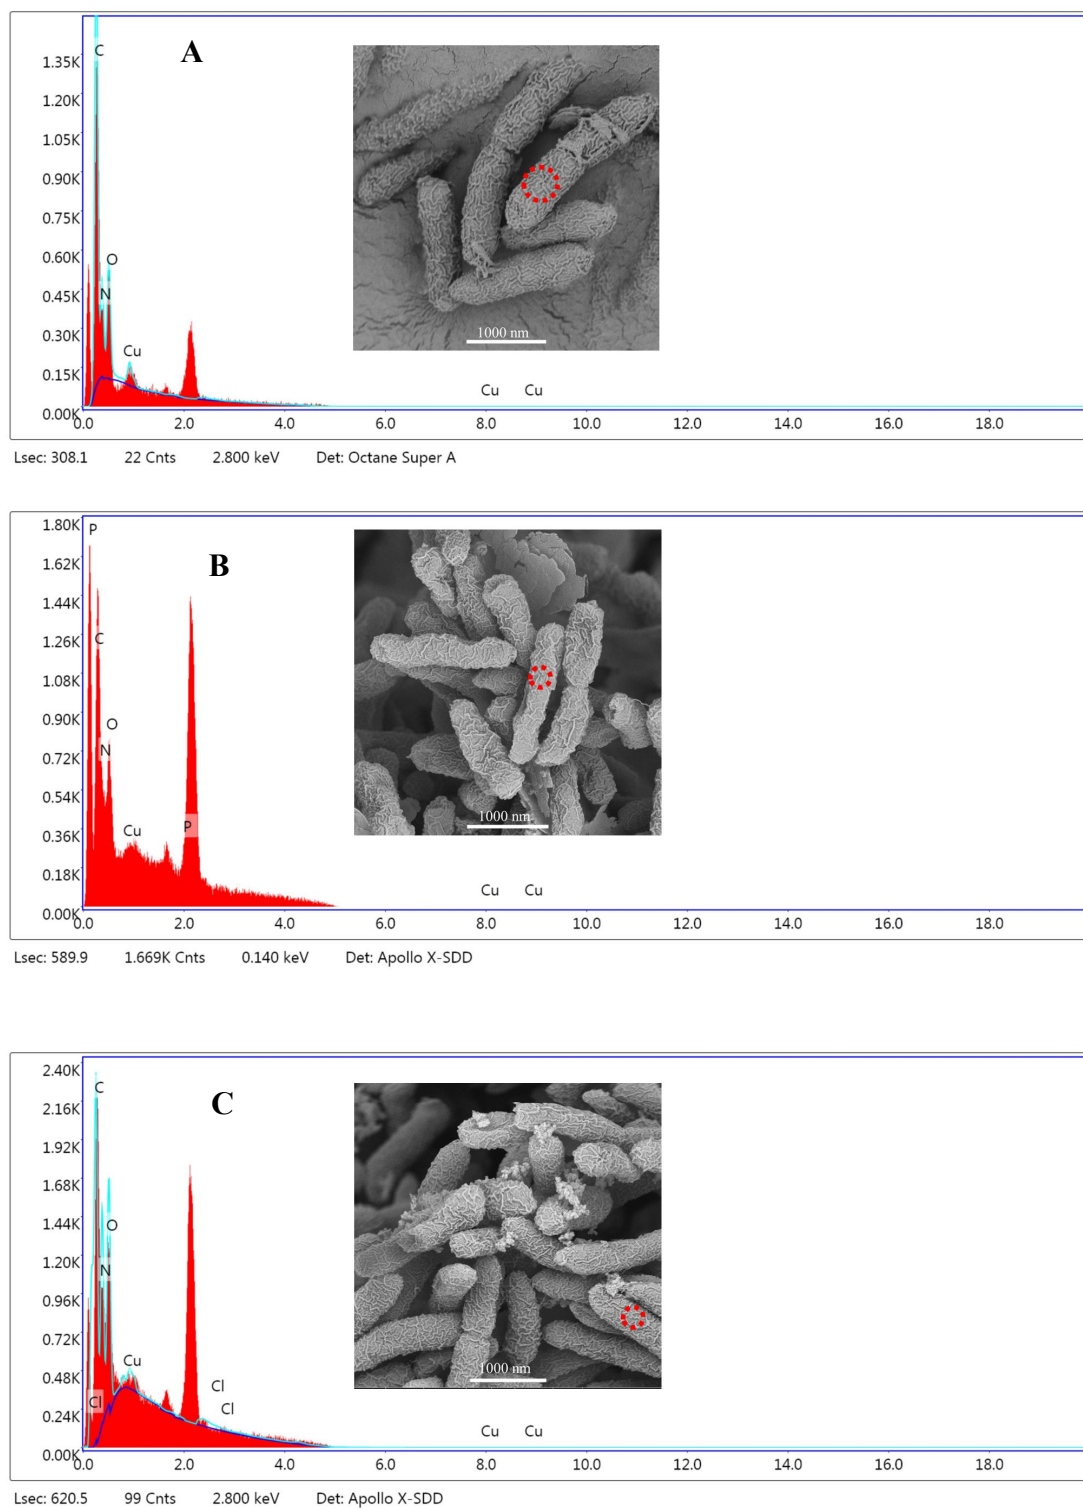

Figure S8. Supplementary SEM images and EDS spectrogram for the interaction between Psa and nanoparticles. A. Cu(OH)<sub>2</sub>; B. Cu<sub>3</sub>(PO<sub>4</sub>)<sub>2</sub>; C. Cu<sub>4</sub>(OH)<sub>6</sub>Cl<sub>2</sub>.

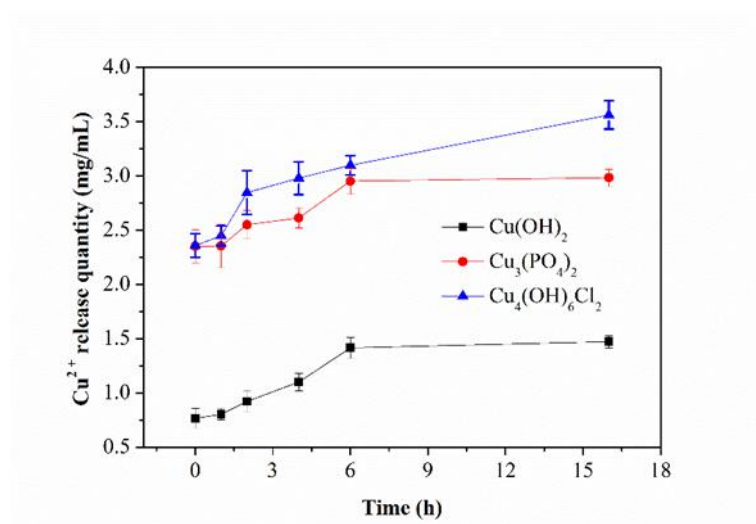

Figure S9. Concentration of  $\text{Cu}^{2+}$  in solution vs time after the indicated nanomaterials was introduced into aqueous solution at a mass concentration of  $200 \mu\text{g/mL}$ .

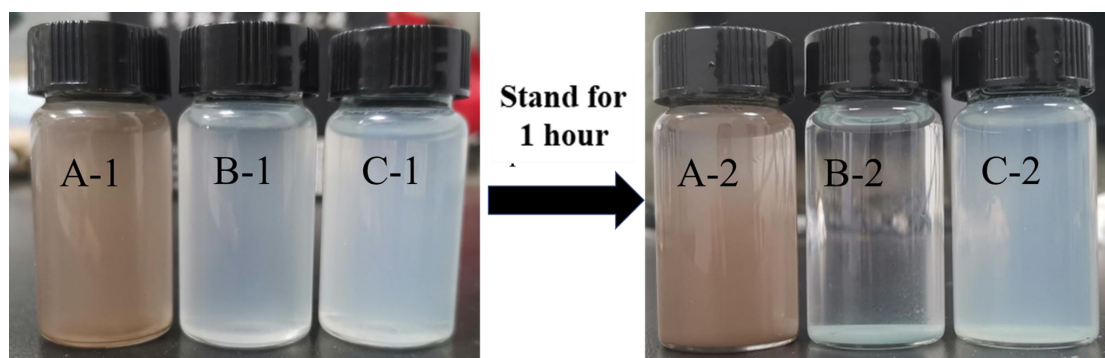

Figure S10. Colloidal stability test of copper-based nanoparticles dispersion. A.  $\text{Cu}(\text{OH})_2$ ; B.  $\text{Cu}_3(\text{PO}_4)_2$ ; C.  $\text{Cu}_4(\text{OH})_6\text{Cl}_2$ .

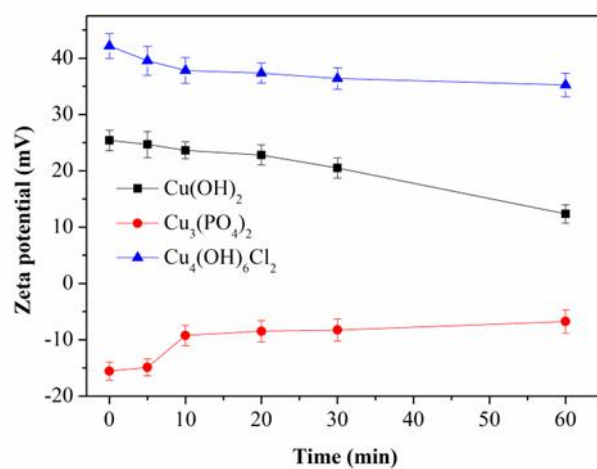

Figure S11. Zeta potential vs time of nanomaterials solution at a mass concentration of  $200 \mu\text{g/mL}$ .
